# Supplementary material for: Embedded 3D printing of UV-curable thermosetting composites with continuous fiber
Source: Royal Society of Chemistry journal article supplement (doi:10.1039/d4mh00705k), 2024-01-01
Supplement: d4mh00705k1.pdf [file d4mh00705k1.pdf]

*Supplementary Materials for*

**Embedded 3D Printing of UV-curable Thermosetting Composites with Continuous Fiber**

*Yuchen Ding*<sup>1</sup>, *Alston X. Gracego*<sup>1</sup>, *Yuanrui Wang*<sup>1</sup>, *Guoying Dong*<sup>1</sup>, *Martin L. Dunn*<sup>1,\*</sup>, *Kai Yu*<sup>1,\*</sup>

<sup>1</sup> Department of Mechanical Engineering, University of Colorado Denver, Denver, CO 80217, USA.

\* E-mail: martin.dunn@ucdenver.edu, kai.2.yu@ucdenver.edu

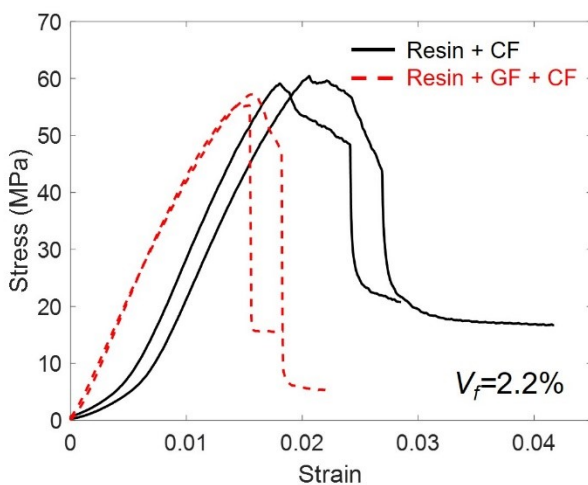

**Figure S1.** Stress-strain relationships of composite filament with and without glass fiber additives

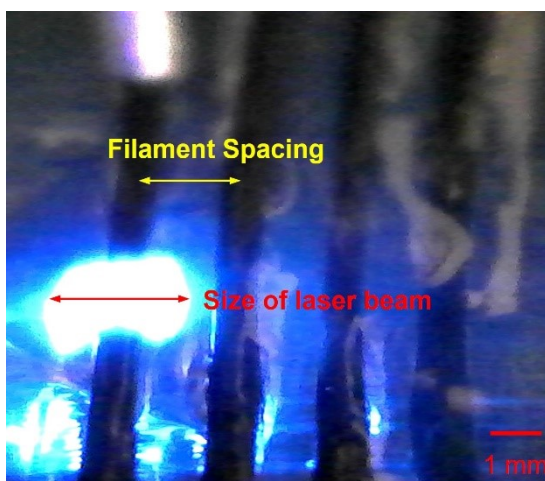

**Figure S2.** An experimental picture taken during the embedded composite printing highlighting the size of the applied laser beam and filament spacing.

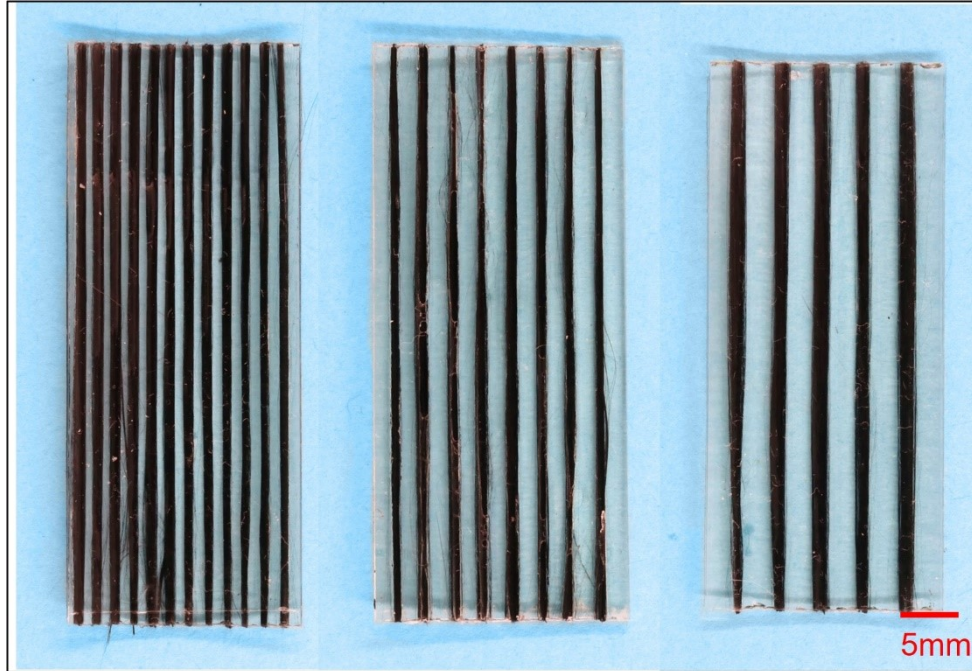

**Figure S3.** Printed single-layer composite lamina with continuous carbon fiber. The different fiber volume fractions are enabled by controlling the filament spacing. From left to right, the fiber volume fractions are 9.6%, 6.0%, and 2.5%, respectively.

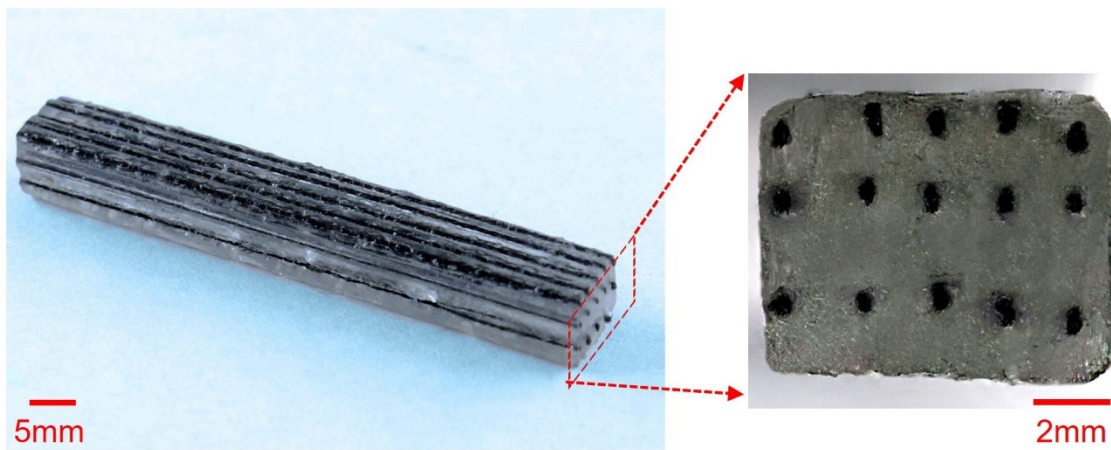

**Figure S4.** A three-layer composite lamina sample embedded with 2.1% continuous polyester fiber.

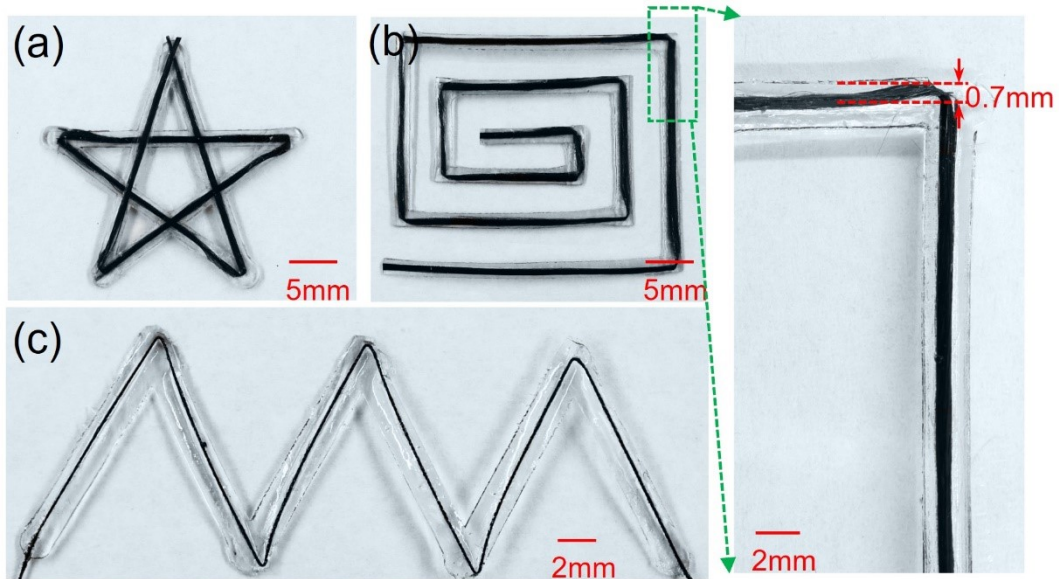

**Figure S5.** Printed composites that require changes in printing directions, including a (a) five-pointed star sample with carbon fiber, (b) a squared spiral sample with carbon fiber, and (c) a zig-zag sample with polyester fiber.
